# Supplementary material for: Peritoneal mesothelioma and asbestos exposure: a population-based case–control study in Lombardy, Italy
Source: PubMed Central journal article supplement — Occup Environ Med. 2019 Jul 8;76(8):545–53. doi: 10.1136/oemed-2019-105826 (PMC6703122; doi:10.1136/oemed-2019-105826), 2019-07-08
Supplement: oemed-2019-105826supp001.pdf [file oemed-2019-105826supp001.pdf]

**Supplementary Table 1** Peritoneal mesothelioma odds ratios (OR) and 90% confidence intervals (CI) for occupational asbestos exposure from the job-exposure matrix (SYN-JEM), calculated with conditional logistic regression models (set: age category), adjusted for province of residence, education, and residual age within age category, Lombardy, Italy, **2000-2007**

| Occupational asbestos exposure          | Men       |                |       |           | Women     |                |      |           |
|-----------------------------------------|-----------|----------------|-------|-----------|-----------|----------------|------|-----------|
|                                         | Cases     | EAGLE controls | OR    | 90% CI    | Cases     | EAGLE controls | OR   | 90% CI    |
|                                         | N (%)     | N (%)          |       |           | N (%)     | N (%)          |      |           |
| Total 2000-2007                         | 41 (100)  | 1617 (100)     |       |           | 27 (100)  | 499 (100)      |      |           |
| Never exposed                           | 20 (48.8) | 1114 (68.9)    | 1.00  | Reference | 21 (77.8) | 449 (90.0)     | 1.00 | Reference |
| Ever exposed                            | 21 (51.2) | 503 (31.1)     | 1.92  | 1.08-3.43 | 6 (22.2)  | 50 (10.0)      | 1.49 | 0.60-3.70 |
| Duration*                               |           |                |       |           |           |                |      |           |
| Never exposed                           | 20 (48.8) | 1114 (69.5)    | 1.00  | Reference | 21 (77.8) | 449 (90.2)     | 1.00 | Reference |
| <10 years                               | 5 (12.2)  | 189 (11.8)     | 1.34  | 0.56-3.19 | 3 (11.1)  | 8 (1.6)        | 7.62 | 1.96-29.6 |
| 10-19 years                             | 5 (12.2)  | 86 (5.4)       | 3.08  | 1.27-7.48 | 0 (0.0)   | 18 (3.6)       | NC   | NC        |
| 20-29 years                             | 4 (9.8)   | 72 (4.5)       | 1.90  | 0.69-5.21 | 3 (11.1)  | 13 (2.6)       | 3.24 | 0.88-11.9 |
| 30+ years                               | 7 (17.1)  | 141 (8.8)      | 2.31  | 1.04-5.14 | 0 (0.0)   | 10 (2.0)       | NC   | NC        |
| P-trend                                 |           |                | 0.04  |           |           |                | 0.84 |           |
| Duration (per 10 years)*                |           |                | 1.25  | 1.05-1.49 |           |                | 0.93 | 0.57-1.54 |
| Cumulative exposure*                    |           |                |       |           |           |                |      |           |
| Never exposed                           | 20 (48.8) | 1114 (69.5)    | 1.00  | Reference | 21 (77.8) | 449 (90.2)     | 1.00 | Reference |
| <0.888 ff/mL-years                      | 7 (17.1)  | 211 (13.2)     | 1.66  | 0.70-3.60 | 3 (11.1)  | 17 (3.4)       | 2.85 | 0.82-9.92 |
| <3.158ff/mL-years                       | 5 (12.2)  | 201 (12.6)     | 1.13  | 0.47-2.72 | 1 (3.7)   | 22 (4.4)       | 0.45 | 0.07-2.72 |
| 3.158+ ff/mL-years                      | 9 (21.9)  | 76 (4.7)       | 4.88  | 2.26-10.5 | 2 (7.4)   | 10 (2.0)       | 2.50 | 0.57-10.9 |
| P-trend                                 |           |                | 0.008 |           |           |                | 0.60 |           |
| Cumulative exposure* (ff/mL-years)      |           |                | 1.34  | 1.16-1.54 |           |                | 0.96 | 0.65-1.41 |
| Cumulative exposure* (log(ff/mL-years)) |           |                | 2.10  | 1.36-3.24 |           |                | 0.87 | 0.35-2.15 |
| TSFE*                                   |           |                |       |           |           |                |      |           |
| Never exposed                           | 20 (48.8) | 1114 (69.3)    | 1.00  | Reference | 21 (77.8) | 449 (90.2)     | 1.00 | Reference |
| <40 years                               | 6 (14.6)  | 159 (9.9)      | 1.61  | 0.71-4.03 | 5 (18.5)  | 26 (5.2)       | 2.87 | 1.02-8.13 |
| 40-49 years                             | 5 (12.2)  | 182 (11.3)     | 1.10  | 0.45-2.72 | 1 (3.7)   | 17 (3.4)       | 0.48 | 0.08-3.00 |
| 50-59 years                             | 6 (14.6)  | 116 (7.2)      | 3.16  | 1.33-7.49 | 0 (0.0)   | 4 (0.8)        | NC   | NC        |
| 60+ years                               | 4 (9.8)   | 36 (2.2)       | 4.04  | 1.33-12.3 | 0 (0.0)   | 2 (0.4)        | NC   | NC        |
| P-trend                                 |           |                | 0.02  |           |           |                | 0.96 |           |

Period 2002-2007 includes cases first diagnosed in 2000-2007 living in five provinces and EAGLE controls enrolled in 2002-2004 living in 216 municipalities of the same five provinces; both series aged 35-79-years.

Abbreviations: NC, not calculated; TSFE, time since first exposure.

\*Missing data for 16 EAGLE controls (15 men and 1 woman) with incomplete job histories.

**Supplementary Table 2** Peritoneal mesothelioma odds ratios (OR) and 90% confidence intervals (CI) for occupational asbestos exposure from the job-exposure matrix (SYN-JEM), calculated with conditional logistic regression models (set: age category), adjusted for province of residence, education, and residual age within age category, Lombardy, Italy, **2008-2015**

| Occupational asbestos exposure         | Men       |                | OR    | 90% CI    | Women     |                | OR   | 90% CI    |
|----------------------------------------|-----------|----------------|-------|-----------|-----------|----------------|------|-----------|
|                                        | Cases     | MISEM controls |       |           | Cases     | MISEM controls |      |           |
|                                        | N (%)*    | N (%)          |       |           | N (%)     | N (%)          |      |           |
| Total 2008-2015                        | 86 (100)  | 141 (100)      |       |           | 73 (100)  | 64 (100)       |      |           |
| Never exposed                          | 35 (40.7) | 94 (66.7)      | 1.00  | Reference | 62 (84.9) | 61 (95.3)      | 1.00 | Reference |
| Ever exposed                           | 51 (59.3) | 47 (33.3)      | 2.85  | 1.61-5.05 | 11 (15.1) | 3 (4.7)        | 2.00 | 0.54-7.34 |
| Duration                               |           |                |       |           |           |                |      |           |
| Never exposed                          | 35 (40.7) | 94 (66.7)      | 1.00  | Reference | 62 (84.9) | 61 (95.3)      | 1.00 | Reference |
| <10 years                              | 14 (16.3) | 22 (15.6)      | 1.87  | 0.86-4.07 | 5 (6.9)   | 0 (0.0)        | NC   | NC        |
| 10-19 years                            | 7 (8.1)   | 3 (2.1)        | 9.63  | 2.22-41.7 | 4 (5.5)   | 2 (3.1)        | 1.02 | 0.17-6.00 |
| 20-29 years                            | 7 (8.1)   | 4 (2.8)        | 3.10  | 0.87-11.1 | 2 (2.7)   | 1 (1.6)        | 0.84 | 0.10-6.99 |
| 30+ years                              | 23 (26.7) | 18 (12.8)      | 3.15  | 1.49-6.66 | 0 (0.0)   | 0 (0.0)        | NC   | NC        |
| P-trend                                |           |                | 0.004 |           |           |                | 0.78 |           |
| Duration (per 10 years)                |           |                | 1.34  | 1.11-1.60 |           |                | 1.04 | 0.48-2.25 |
| Cumulative exposure                    |           |                |       |           |           |                |      |           |
| Never exposed                          | 35 (40.7) | 94 (66.7)      | 1.00  | Reference | 62 (84.9) | 61 (95.3)      | 1.00 | Reference |
| <0.888 ff/mL-years                     | 15 (17.4) | 20 (14.2)      | 2.15  | 0.99-4.68 | 4 (5.5)   | 2 (3.1)        | 1.13 | 0.21-6.03 |
| <3.158ff/mL-years                      | 20 (23.3) | 17 (12.1)      | 2.93  | 1.35-6.33 | 4 (5.5)   | 1 (1.6)        | 3.09 | 0.40-23.7 |
| 3.158+ ff/mL-years                     | 16 (18.6) | 10 (7.1)       | 4.12  | 1.69-10.1 | 3 (4.1)   | 0 (0.0)        | NC   | NC        |
| P-trend                                |           |                | 0.002 |           |           |                | 0.27 |           |
| Cumulative exposure (ff/mL-years)      |           |                | 1.37  | 1.13-1.67 |           |                | 2.08 | 0.71-6.16 |
| Cumulative exposure (log(ff/mL-years)) |           |                | 2.54  | 1.60-4.02 |           |                | 3.57 | 0.59-21.7 |
| TSFE                                   |           |                |       |           |           |                |      |           |
| Never exposed                          | 35 (40.7) | 94 (66.7)      | 1.00  | Reference | 62 (84.9) | 61 (95.3)      | 1.00 | Reference |
| <40 years                              | 8 (9.3)   | 8 (5.7)        | 2.00  | 0.65-6.22 | 1 (1.4)   | 1 (1.6)        | 0.30 | 0.02-3.66 |
| 40-49 years                            | 13 (15.1) | 17 (12.1)      | 1.82  | 0.74-4.47 | 6 (8.2)   | 1 (1.6)        | 1.62 | 0.22-12.2 |
| 50-59 years                            | 18 (20.9) | 19 (13.5)      | 2.80  | 1.28-6.10 | 4 (5.5)   | 1 (1.6)        | 5.20 | 0.66-41.3 |
| 60+ years                              | 12 (14.0) | 3 (2.1)        | 10.2  | 2.51-41.5 | 0 (0.0)   | 0 (0.0)        | NC   | NC        |
| P-trend                                |           |                | 0.001 |           |           |                | 0.21 |           |

Period 2008-2015 includes cases first diagnosed in 2008-2015 and MISEM controls enrolled in 2014; both series living in any province and aged 20-89 years.

Abbreviations: NC, not calculated; TSFE, time since first exposure.

**Supplementary Table 3** Peritoneal mesothelioma odds ratios (OR) and 90% confidence intervals (CI) for expert-based assessment of asbestos exposure based on the national mesothelioma registry (ReNaM) questionnaire, calculated with conditional logistic regression models (set: age category), adjusted for province of residence, education, and residual age within age category, Lombardy, Italy, 2008-2015. **Analysis restricted to subjects directly interviewed**

| Asbestos exposure                         | Men            |                   |        |           | Women           |                   |      |           |
|-------------------------------------------|----------------|-------------------|--------|-----------|-----------------|-------------------|------|-----------|
|                                           | Cases<br>N (%) | Controls<br>N (%) | OR     | 90% CI    | Cases*<br>N (%) | Controls<br>N (%) | OR   | 90% CI    |
| Total 2008-2015                           | 53 (100)       | 141 (100)         |        |           | 39 (100)        | 64 (100)          |      |           |
| Never exposed                             | 13 (24.5)      | 90 (63.8)         | 1.00   | Reference | 23 (59.0)       | 59 (92.2)         | 1.00 | Reference |
| Ever exposed                              | 40 (75.5)      | 51 (36.2)         | 7.23   | 3.23-16.2 | 16 (41.0)       | 5 (7.8)           | 9.91 | 2.36-41.5 |
| Source/probability                        |                |                   |        |           |                 |                   |      |           |
| Never exposed                             | 13 (24.5)      | 90 (63.8)         | 1.00   | Reference | 23 (59.0)       | 59 (92.2)         | 1.00 | Reference |
| Extra-occupational                        | 0 (0.0)        | 3 (2.1)           | NC     | NC        | 1 (2.6)         | 0 (0.0)           | NC   | NC        |
| Occupational, pp                          | 9 (17.0)       | 25 (17.7)         | 2.48   | 0.88-7.02 | 3 (7.7)         | 3 (4.7)           | 1.65 | 0.14-19.4 |
| Occupational, definite                    | 31 (58.5)      | 23 (16.3)         | 19.8   | 7.22-54.4 | 12 (30.8)       | 2 (3.1)           | 18.1 | 3.05-107  |
| Occupational, duration*                   |                |                   |        |           |                 |                   |      |           |
| Never exposed                             | 13 (24.5)      | 90 (65.2)         | 1.00   | Reference | 23 (60.5)       | 59 (92.2)         | 1.00 | Reference |
| <10 years                                 | 10 (18.9)      | 16 (11.6)         | 4.27   | 1.51-12.0 | 5 (13.2)        | 0 (0.0)           | NC   | NC        |
| 10-19 years                               | 5 (9.4)        | 9 (6.5)           | 5.85   | 1.39-24.6 | 7 (18.4)        | 4 (6.2)           | 5.09 | 0.96-27.0 |
| 20-29 years                               | 4 (7.6)        | 7 (5.1)           | 4.66   | 1.09-19.9 | 2 (5.3)         | 0 (0.0)           | NC   | NC        |
| 30+ years                                 | 21 (39.6)      | 16 (11.6)         | 15.4   | 5.59-42.6 | 1 (2.6)         | 1 (1.6)           | 4.32 | 0.27-68.1 |
| P-trend                                   |                |                   | <0.001 |           |                 |                   | 0.11 |           |
| Occupational, duration*<br>(per 10 years) |                |                   | 1.72   | 1.37-2.16 |                 |                   | 1.73 | 0.86-3.48 |
| Occupational, TSFE*                       |                |                   |        |           |                 |                   |      |           |
| Never exposed                             | 13 (24.5)      | 90 (65.2)         | 1.00   | Reference | 23 (60.5)       | 59 (92.2)         | 1.00 | Reference |
| <40 years                                 | 6 (11.3)       | 10 (7.3)          | 4.68   | 1.13-19.3 | 2 (5.3)         | 0 (0.0)           | NC   | NC        |
| 40-49 years                               | 18 (34.0)      | 14 (10.1)         | 12.6   | 4.49-35.4 | 4 (10.5)        | 1 (1.6)           | NC   | NC        |
| 50-59 years                               | 10 (18.9)      | 19 (13.8)         | 4.36   | 1.57-12.1 | 5 (13.2)        | 1 (1.6)           | 13.3 | 1.47-120  |
| 60+ years                                 | 6 (11.3)       | 5 (3.6)           | 15.0   | 2.93-76.3 | 4 (10.5)        | 3 (4.7)           | 5.82 | 0.99-34.1 |
| P-trend                                   |                |                   | <0.001 |           |                 |                   | 0.02 |           |

Period 2008-2015 includes cases directly interviewed first diagnosed in 2008-2015 and MISEM controls enrolled in 2014; both series living in any province and aged 20-89 years.

Abbreviations: NC, not calculated; pp, possible/probable; TSFE, time since first exposure.

\*Cases with extra-occupational exposure not included in analysis.

**Supplementary Table 4** Peritoneal mesothelioma odds ratios (OR) and 90% confidence intervals (CI) for occupational asbestos exposure from the job-exposure matrix (SYN-JEM), calculated with conditional logistic regression models (set: age category), adjusted for period (2000-2007 and 2008-2015), province of residence, education, and residual age within age category, Lombardy, Italy, 2000-2015. **Analysis restricted to subjects directly interviewed**

| Occupational asbestos exposure             | Men            |                   | OR    | 90% CI    | Women          |                   | OR   | 90% CI    |
|--------------------------------------------|----------------|-------------------|-------|-----------|----------------|-------------------|------|-----------|
|                                            | Cases<br>N (%) | Controls<br>N (%) |       |           | Cases<br>N (%) | Controls<br>N (%) |      |           |
| Total 2000-2015                            | 69 (100)       | 1758 (100)        |       |           | 51 (100)       | 563 (100)         |      |           |
| Total 2000-2007                            | 16 (23.2)      | 1617 (92.0)       |       |           | 12 (23.5)      | 499 (88.6)        |      |           |
| Total 2008-2015                            | 53 (76.8)      | 141 (8.0)         |       |           | 39 (76.5)      | 64 (11.4)         |      |           |
| Never exposed                              | 32 (46.4)      | 1208 (68.7)       | 1.00  | Reference | 39 (76.5)      | 510 (90.6)        | 1.00 | Reference |
| Ever exposed                               | 37 (53.6)      | 550 (31.3)        | 1.79  | 1.08-2.96 | 12 (23.5)      | 53 (9.4)          | 3.14 | 1.24-7.99 |
| Duration*                                  |                |                   |       |           |                |                   |      |           |
| Never exposed                              | 32 (46.4)      | 1208 (69.3)       | 1.00  | Reference | 39 (76.5)      | 510 (90.7)        | 1.00 | Reference |
| <10 years                                  | 11 (15.9)      | 211 (12.1)        | 1.46  | 0.72-2.93 | 5 (9.8)        | 8 (1.4)           | 18.1 | 3.92-83.3 |
| 10-19 years                                | 3 (4.3)        | 89 (5.1)          | 1.98  | 0.63-6.19 | 4 (7.8)        | 20 (3.6)          | 1.32 | 0.30-5.80 |
| 20-29 years                                | 6 (8.7)        | 76 (4.4)          | 2.01  | 0.75-5.38 | 3 (5.9)        | 14 (2.5)          | 2.65 | 0.49-14.3 |
| 30+ years                                  | 17 (24.6)      | 159 (9.1)         | 2.07  | 1.08-3.99 | 0 (0.0)        | 10 (1.8)          | NC   | NC        |
| P-trend                                    |                |                   | 0.045 |           |                |                   | 0.32 |           |
| Duration (per 10 years)*                   |                |                   | 1.22  | 1.05-1.42 |                |                   | 1.13 | 0.68-1.88 |
| Cumulative exposure*                       |                |                   |       |           |                |                   |      |           |
| Never exposed                              | 32 (46.4)      | 1208 (69.3)       | 1.00  | Reference | 39 (76.5)      | 510 (90.7)        | 1.00 | Reference |
| <0.888 ff/mL-years                         | 11 (15.9)      | 231 (13.3)        | 1.28  | 0.62-2.61 | 5 (9.8)        | 19 (3.4)          | 3.04 | 0.86-10.8 |
| <3.158ff/mL-years                          | 13 (18.8)      | 218 (12.5)        | 1.59  | 0.81-3.15 | 3 (5.9)        | 23 (4.1)          | 1.44 | 0.27-7.55 |
| 3.158+ ff/mL-years                         | 13 (18.8)      | 86 (4.9)          | 3.55  | 1.66-7.59 | 4 (7.8)        | 10 (1.8)          | 9.02 | 2.00-40.8 |
| P-trend                                    |                |                   | 0.01  |           |                |                   | 0.03 |           |
| Cumulative exposure*<br>(ff/mL-years)      |                |                   | 1.31  | 1.13-1.52 |                |                   | 1.46 | 1.03-2.08 |
| Cumulative exposure*<br>(log(ff/mL-years)) |                |                   | 2.05  | 1.38-3.06 |                |                   | 2.50 | 1.04-6.03 |
| TSFE                                       |                |                   |       |           |                |                   |      |           |
| Never exposed                              | 32 (46.4)      | 1208 (69.1)       | 1.00  | Reference | 39 (76.5)      | 510 (90.7)        | 1.00 | Reference |
| <40 years                                  | 8 (11.6)       | 167 (9.6)         | 1.35  | 0.58-3.15 | 5 (9.8)        | 27 (4.8)          | 3.67 | 1.06-12.8 |
| 40-49 years                                | 10 (14.5)      | 199 (11.4)        | 1.27  | 0.58-2.78 | 5 (9.8)        | 18 (3.2)          | 3.02 | 0.71-12.7 |
| 50-59 years                                | 13 (18.8)      | 135 (7.7)         | 2.24  | 1.07-4.68 | 2 (3.9)        | 5 (0.9)           | 2.19 | 0.24-20.1 |
| 60+ years                                  | 6 (8.7)        | 39 (2.2)          | 3.90  | 1.21-12.6 | 0 (0.0)        | 2 (0.4)           | NC   | NC        |
| P-trend                                    |                |                   | 0.02  |           |                |                   | 0.10 |           |

Period 2002-2007 includes cases directly interviewed first diagnosed in 2000-2007 living in five provinces and EAGLE controls enrolled in 2002-2004 living in 216 municipalities of the same five provinces; both series aged 35-79-years. Period 2008-2015 includes cases first diagnosed in 2008-2015 and MISEM controls enrolled in 2014; both series living in any province and aged 20-89 years.

Abbreviations: TSFE, time since first exposure.

\*Missing data for 16 EAGLE controls (15 men and 1 woman) with incomplete job histories.

**Supplementary Table 5** Peritoneal mesothelioma odds ratios (OR) and 90% confidence intervals (CI) for occupational asbestos exposure from the job-exposure matrix (SYN-JEM), calculated with conditional logistic regression models (set: age category), adjusted for period (2000-2007 and 2008-2015), province of residence, education, and residual age within age category, Lombardy, Italy, 2000-2015. **In 2000-2007 only cases living in the same 216 municipalities of EAGLE controls were included (spatial restriction)**

| Occupational asbestos exposure          | Men         |                | OR    | 90% CI    | Women       |                | OR   | 90% CI    |
|-----------------------------------------|-------------|----------------|-------|-----------|-------------|----------------|------|-----------|
|                                         | Cases N (%) | Controls N (%) |       |           | Cases N (%) | Controls N (%) |      |           |
| Total 2000-2015                         | 105 (100)   | 1758 (100)     |       |           | 81 (100)    | 563 (100)      |      |           |
| Total 2000-2007                         | 19 (18.1)   | 1617 (92.0)    |       |           | 17 (21.0)   | 499 (88.6)     |      |           |
| Total 2008-2015                         | 86 (81.9)   | 141 (8.0)      |       |           | 64 (79.0)   | 64 (11.4)      |      |           |
| Never exposed                           | 46 (43.8)   | 1208 (68.7)    | 1.00  | Reference | 68 (84.0)   | 510 (90.6)     | 1.00 | Reference |
| Ever exposed                            | 59 (56.2)   | 550 (31.3)     | 2.04  | 1.31-3.18 | 13 (16.0)   | 53 (9.4)       | 1.78 | 0.65-4.82 |
| Duration*                               |             |                |       |           |             |                |      |           |
| Never exposed                           | 46 (43.8)   | 1208 (69.3)    | 1.00  | Reference | 68 (84.0)   | 510 (90.7)     | 1.00 | Reference |
| <10 years                               | 17 (16.2)   | 211 (12.1)     | 1.54  | 0.83-2.84 | 5 (6.2)     | 8 (1.4)        | 4.65 | 0.65-33.1 |
| 10-19 years                             | 10 (9.5)    | 89 (5.1)       | 4.24  | 1.90-9.46 | 4 (4.9)     | 20 (3.6)       | 0.68 | 0.15-3.11 |
| 20-29 years                             | 7 (6.7)     | 76 (4.4)       | 1.54  | 0.59-3.98 | 4 (4.9)     | 14 (2.5)       | 3.59 | 0.76-17.1 |
| 30+ years                               | 25 (23.8)   | 159 (9.1)      | 2.24  | 1.23-4.08 | 0 (0.0)     | 10 (1.8)       | NC   | NC        |
| P-trend                                 |             |                | 0.01  |           |             |                | 0.44 |           |
| Duration (per 10 years)*                |             |                | 1.23  | 1.07-1.42 |             |                | 1.18 | 0.70-2.00 |
| Cumulative exposure*                    |             |                |       |           |             |                |      |           |
| Never exposed                           | 46 (43.8)   | 1208 (69.3)    | 1.00  | Reference | 68 (84.0)   | 510 (90.7)     | 1.00 | Reference |
| <0.888 ff/mL-years                      | 19 (18.1)   | 231 (13.3)     | 1.75  | 0.96-3.18 | 4 (4.9)     | 19 (3.4)       | 0.76 | 0.17-3.32 |
| <3.158ff/mL-years                       | 22 (21.0)   | 218 (12.5)     | 1.82  | 1.00-3.29 | 4 (4.9)     | 23 (4.1)       | 1.36 | 0.29-6.37 |
| 3.158+ ff/mL-years                      | 18 (17.1)   | 86 (4.9)       | 3.31  | 1.63-6.69 | 5 (6.2)     | 10 (1.8)       | 9.84 | 2.07-46.9 |
| P-trend                                 |             |                | 0.003 |           |             |                | 0.08 |           |
| Cumulative exposure* (ff/mL-years)      |             |                | 1.25  | 1.09-1.42 |             |                | 1.50 | 1.05-2.14 |
| Cumulative exposure* (log(ff/mL-years)) |             |                | 1.93  | 1.36-2.74 |             |                | 2.71 | 1.10-6.68 |
| TSFE                                    |             |                |       |           |             |                |      |           |
| Never exposed                           | 46 (43.8)   | 1208 (69.1)    | 1.00  | Reference | 68 (84.0)   | 510 (90.7)     | 1.00 | Reference |
| <40 years                               | 11 (10.5)   | 167 (9.6)      | 1.36  | 0.63-2.95 | 2 (2.5)     | 27 (4.8)       | 0.93 | 0.14-6.20 |
| 40-49 years                             | 14 (13.3)   | 199 (11.4)     | 1.18  | 0.58-2.42 | 7 (8.6)     | 18 (3.2)       | 2.16 | 0.50-9.24 |
| 50-59 years                             | 21 (20.0)   | 135 (7.7)      | 2.83  | 1.49-5.39 | 4 (4.9)     | 5 (0.9)        | 2.47 | 0.39-15.6 |
| 60+ years                               | 13 (12.4)   | 39 (2.2)       | 5.42  | 2.08-14.2 | 0 (0.0)     | 2 (0.4)        | NC   | NC        |
| P-trend                                 |             |                | 0.001 |           |             |                | 0.28 |           |

Period 2000-2007 includes cases first diagnosed in 2000-2007 and EAGLE controls enrolled in 2002-2004; both series living in 216 municipalities in five provinces and aged 35-79 years. Period 2008-2015 includes cases first diagnosed in 2008-2015 and MISEM controls enrolled in 2014; both series living in any province and aged 20-89 years.

Abbreviations: TSFE, time since first exposure.

\*Missing data for 16 EAGLE controls (15 men and 1 woman) with incomplete job histories.

**Supplementary Figure 1** Association between peritoneal mesothelioma risk and SYN-JEM-based cumulative asbestos exposure (ff/mL-years) in men (same cases and controls as in Supplementary Table 5) using restricted cubic splines (knots at 10th, 25th, 50th, 75th and 90th percentiles of cumulative exposure among exposed, log-transformed), Lombardy, Italy, 2000-2015  
Notes: CI, confidence interval; OR, odds ratio; the dashed line shows the log-linear relationship OR = 1.93 per ln(ff/mL-years) (see Supplementary Table 5); vertical bars close to the horizontal axis indicate cases (upper bars) and controls (lower bars).

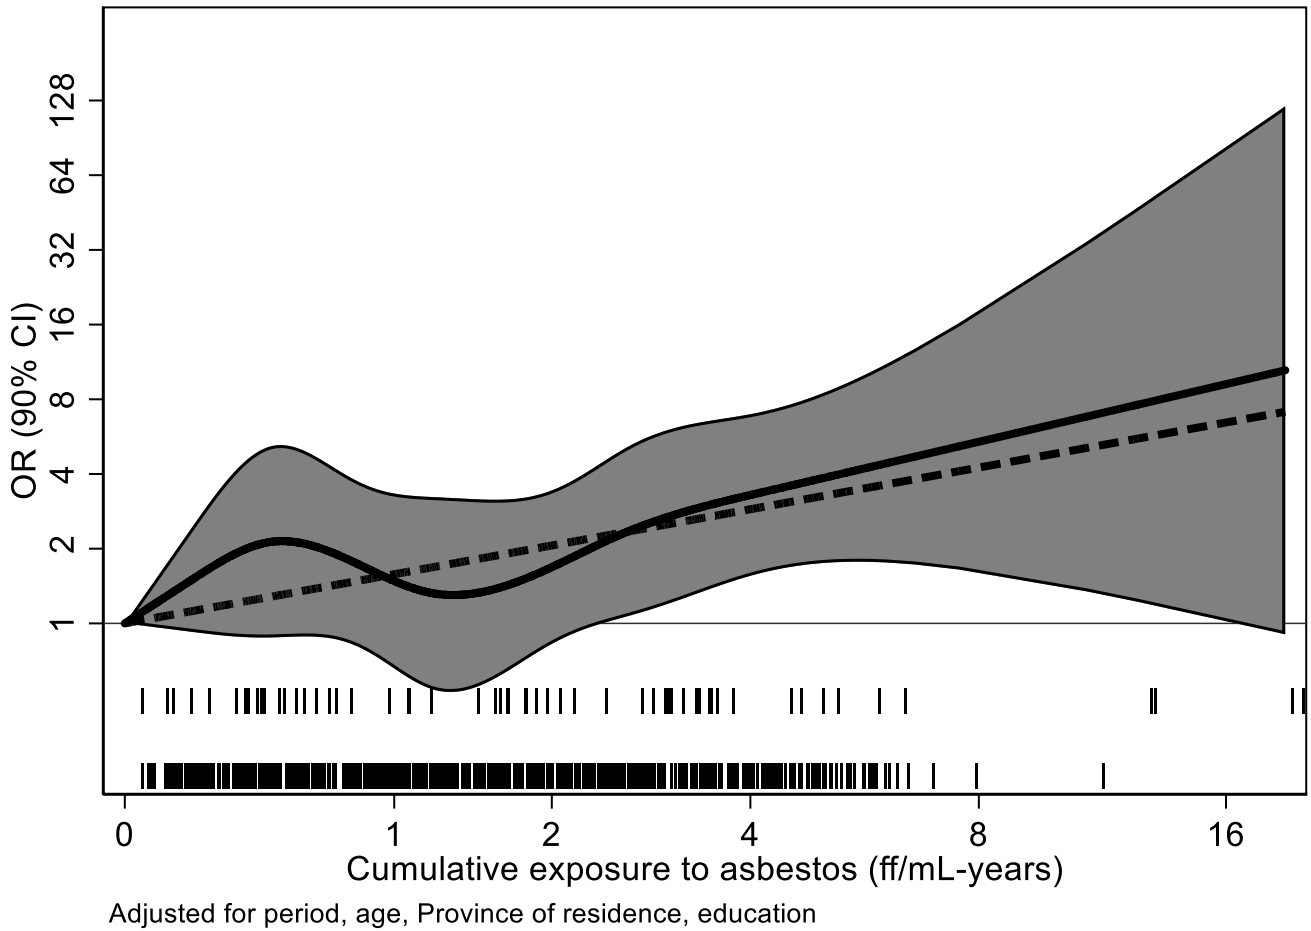

**Supplementary Table 6** Peritoneal mesothelioma odds ratios (OR) and 90% confidence intervals (CI) for expert-based assessment of asbestos exposure based on the national mesothelioma registry (ReNaM) questionnaire, calculated with conditional logistic regression models (set: age category), adjusted for province of residence, education, and residual age within age category, Lombardy, Italy, 2010-2014. **Analysis restricted to cases first diagnosed in 2010-2014 (temporal restriction)**

| Asbestos exposure                         | Men            |                   |        |           | Women           |                   |      |           |
|-------------------------------------------|----------------|-------------------|--------|-----------|-----------------|-------------------|------|-----------|
|                                           | Cases<br>N (%) | Controls<br>N (%) | OR     | 90% CI    | Cases*<br>N (%) | Controls<br>N (%) | OR   | 90% CI    |
| Total 2010-2014                           | 53 (100)       | 141 (100)         |        |           | 46 (100)        | 64 (100)          |      |           |
| Never exposed                             | 14 (26.4)      | 90 (63.8)         | 1.00   | Reference | 29 (63.0)       | 59 (92.2)         | 1.00 | Reference |
| Ever exposed                              | 39 (73.6)      | 51 (36.2)         | 7.01   | 3.12-15.7 | 17 (37.0)       | 5 (7.8)           | 8.67 | 2.34-32.1 |
| Source/probability                        |                |                   |        |           |                 |                   |      |           |
| Never exposed                             | 14 (26.4)      | 90 (63.8)         | 1.00   | Reference | 29 (63.0)       | 59 (92.2)         | 1.00 | Reference |
| Extra-occupational                        | 0 (0.0)        | 3 (2.1)           | NC     | NC        | 1 (2.2)         | 0 (0.0)           | NC   | NC        |
| Occupational, pp                          | 11 (20.8)      | 25 (17.7)         | 3.25   | 1.22-8.62 | 2 (4.4)         | 3 (4.7)           | 2.33 | 0.30-18.1 |
| Occupational, definite                    | 28 (52.8)      | 23 (16.3)         | 16.1   | 5.89-44.0 | 14 (30.4)       | 2 (3.1)           | 14.2 | 2.74-74.0 |
| Occupational, duration†                   |                |                   |        |           |                 |                   |      |           |
| Never exposed                             | 14 (26.4)      | 90 (65.2)         | 1.00   | Reference | 29 (64.0)       | 59 (92.2)         | 1.00 | Reference |
| <10 years                                 | 8 (15.1)       | 16 (11.6)         | 3.71   | 1.25-11.0 | 9 (20.0)        | 0 (0.0)           | NC   | NC        |
| 10-19 years                               | 7 (13.2)       | 9 (6.5)           | 15.0   | 4.03-55.9 | 5 (11.1)        | 4 (6.2)           | 1.64 | 0.24-11.3 |
| 20-29 years                               | 2 (3.8)        | 7 (5.1)           | 1.34   | 0.23-7.82 | 1 (2.2)         | 0 (0.0)           | NC   | NC        |
| 30+ years                                 | 22 (41.5)      | 16 (11.6)         | 12.8   | 4.71-34.5 | 1 (2.2)         | 1 (1.6)           | 1.86 | 0.14-24.7 |
| P-trend                                   |                |                   | <0.001 |           |                 |                   | 0.21 |           |
| Occupational, duration†<br>(per 10 years) |                |                   | 1.62   | 1.30-2.01 |                 |                   | 1.40 | 0.71-2.76 |
| Occupational, TSFE†                       |                |                   |        |           |                 |                   |      |           |
| Never exposed                             | 14 (26.4)      | 90 (65.2)         | 1.00   | Reference | 29 (63.0)       | 59 (92.2)         | 1.00 | Reference |
| <40 years                                 | 3 (5.7)        | 10 (7.3)          | 2.80   | 0.58-13.6 | 0 (0.0)         | 0 (0.0)           | NC   | NC        |
| 40-49 years                               | 16 (30.2)      | 14 (10.1)         | 9.79   | 3.40-28.2 | 5 (11.1)        | 1 (1.6)           | NC   | NC        |
| 50-59 years                               | 12 (22.6)      | 19 (13.8)         | 4.66   | 1.66-13.1 | 6 (13.3)        | 1 (1.6)           | 15.3 | 2.00-116  |
| 60+ years                                 | 8 (15.1)       | 5 (3.6)           | 15.3   | 3.69-63.7 | 5 (11.1)        | 3 (4.7)           | 3.36 | 0.56-20.2 |
| P-trend                                   |                |                   | <0.001 |           |                 |                   | 0.02 |           |

Period 2010-2014 includes cases first diagnosed in 2010-2014 and MISEM controls enrolled in 2014; both series living in any province and aged 20-89 years.

Abbreviations: NC, not calculated; pp, possible/probable; TSFE, time since first exposure.

\*One female case with non-classifiable exposure not included in analysis.

†Cases with extra-occupational exposure not included in analysis.

**Supplementary Table 7** Peritoneal mesothelioma odds ratios (OR) and 90% confidence intervals (CI) for occupational asbestos exposure from the job-exposure matrix (SYN-JEM), calculated with conditional logistic regression models (set: age category), adjusted for period (2000-2007 and 2008-2015), province of residence, education, and residual age within age category, Lombardy, Italy, 2000-2014. **Analysis restricted to cases first diagnosed in 2000-2004 or in 2010-2014 (temporal restriction)**

| Occupational asbestos exposure             | Men            |                   | OR    | 90% CI    | Women          |                   | OR   | 90% CI    |
|--------------------------------------------|----------------|-------------------|-------|-----------|----------------|-------------------|------|-----------|
|                                            | Cases<br>N (%) | Controls<br>N (%) |       |           | Cases<br>N (%) | Controls<br>N (%) |      |           |
| Total 2000-2014                            | 74 (100)       | 1758 (100)        |       |           | 63 (100)       | 563 (100)         |      |           |
| Total 2000-2004                            | 21 (28.4)      | 1617 (92.0)       |       |           | 17 (27.0)      | 499 (88.6)        |      |           |
| Total 2010-2014                            | 53 (71.6)      | 141 (8.0)         |       |           | 46 (73.0)      | 64 (11.4)         |      |           |
| Never exposed                              | 35 (47.3)      | 1208 (68.7)       | 1.00  | Reference | 52 (82.5)      | 510 (90.6)        | 1.00 | Reference |
| Ever exposed                               | 39 (52.7)      | 550 (31.3)        | 1.89  | 1.15-3.12 | 11 (17.5)      | 53 (9.4)          | 1.74 | 0.75-4.03 |
| Duration*                                  |                |                   |       |           |                |                   |      |           |
| Never exposed                              | 35 (47.3)      | 1208 (69.3)       | 1.00  | Reference | 52 (82.5)      | 510 (90.7)        | 1.00 | Reference |
| <10 years                                  | 13 (17.6)      | 211 (12.1)        | 1.74  | 0.89-3.39 | 4 (6.3)        | 8 (1.4)           | 5.93 | 1.46-24.1 |
| 10-19 years                                | 6 (8.1)        | 89 (5.1)          | 2.58  | 0.98-6.81 | 3 (4.8)        | 20 (3.6)          | 0.68 | 0.16-2.83 |
| 20-29 years                                | 4 (5.4)        | 76 (4.4)          | 1.48  | 0.51-4.31 | 4 (6.3)        | 14 (2.5)          | 2.53 | 0.64-9.98 |
| 30+ years                                  | 16 (21.6)      | 159 (9.1)         | 2.11  | 1.07-4.13 | 0 (0.0)        | 10 (1.8)          | NC   | NC        |
| P-trend                                    |                |                   | 0.06  |           |                |                   | 0.58 |           |
| Duration (per 10 years)*                   |                |                   | 1.20  | 1.02-1.40 |                |                   | 1.09 | 0.70-1.71 |
| Cumulative exposure*                       |                |                   |       |           |                |                   |      |           |
| Never exposed                              | 35 (47.3)      | 1208 (69.3)       | 1.00  | Reference | 52 (82.5)      | 510 (90.7)        | 1.00 | Reference |
| <0.888 ff/mL-years                         | 15 (20.3)      | 231 (13.3)        | 2.05  | 1.07-3.92 | 4 (6.3)        | 19 (3.4)          | 1.24 | 0.36-4.31 |
| <3.158ff/mL-years                          | 11 (14.9)      | 218 (12.5)        | 1.03  | 0.49-2.17 | 4 (6.3)        | 23 (4.1)          | 1.79 | 0.50-6.42 |
| 3.158+ ff/mL-years                         | 13 (17.6)      | 86 (4.9)          | 3.89  | 1.86-8.15 | 3 (4.8)        | 10 (1.8)          | 3.59 | 0.76-17.0 |
| P-trend                                    |                |                   | 0.02  |           |                |                   | 0.16 |           |
| Cumulative exposure*<br>(ff/mL-years)      |                |                   | 1.24  | 1.08-1.41 |                |                   | 1.24 | 0.89-1.72 |
| Cumulative exposure*<br>(log(ff/mL-years)) |                |                   | 1.84  | 1.25-2.69 |                |                   | 1.79 | 0.80-4.03 |
| TSFE                                       |                |                   |       |           |                |                   |      |           |
| Never exposed                              | 35 (47.3)      | 1208 (69.1)       | 1.00  | Reference | 52 (82.5)      | 510 (90.7)        | 1.00 | Reference |
| <40 years                                  | 5 (6.8)        | 167 (9.6)         | 0.88  | 0.33-2.31 | 4 (6.3)        | 27 (4.8)          | 2.03 | 0.62-6.37 |
| 40-49 years                                | 12 (16.2)      | 199 (11.4)        | 1.31  | 0.61-2.78 | 5 (7.9)        | 18 (3.2)          | 1.33 | 0.36-4.95 |
| 50-59 years                                | 11 (14.9)      | 135 (7.7)         | 2.22  | 1.05-4.68 | 2 (3.2)        | 5 (0.9)           | 2.23 | 0.35-14.1 |
| 60+ years                                  | 11 (14.9)      | 39 (2.2)          | 6.28  | 2.47-16.0 | 0 (0.0)        | 2 (0.4)           | NC   | NC        |
| P-trend                                    |                |                   | 0.002 |           |                |                   | 0.35 |           |

Period 2000-2004 includes cases first diagnosed in 2000-2004 living in five provinces and EAGLE controls enrolled in 2002-2004 living in 216 municipalities of the same five provinces; both series aged 35-79-years. Period 2010-2014 includes cases first diagnosed in 2010-2014 and MISEM controls enrolled in 2014; both series living in any province and aged 20-89 years.

Abbreviations: TSFE, time since first exposure.

\*Missing data for 16 EAGLE controls (15 men and 1 woman) with incomplete job histories.



**Supplementary Figure 2** Association between peritoneal mesothelioma risk and SYN-JEM-based cumulative asbestos exposure (ff/mL-years) in men (same cases and controls as in Supplementary Table 7) using restricted cubic splines (knots at 10th, 25th, 50th, 75th and 90th percentiles of cumulative exposure among exposed, log-transformed), Lombardy, Italy, 2000-2014  
Notes: CI, confidence interval; OR, odds ratio; the dashed line shows the log-linear relationship OR = 1.84 per ln(ff/mL-years) (see Supplementary Table 7); vertical bars close to the horizontal axis indicate cases (upper bars) and controls (lower bars).

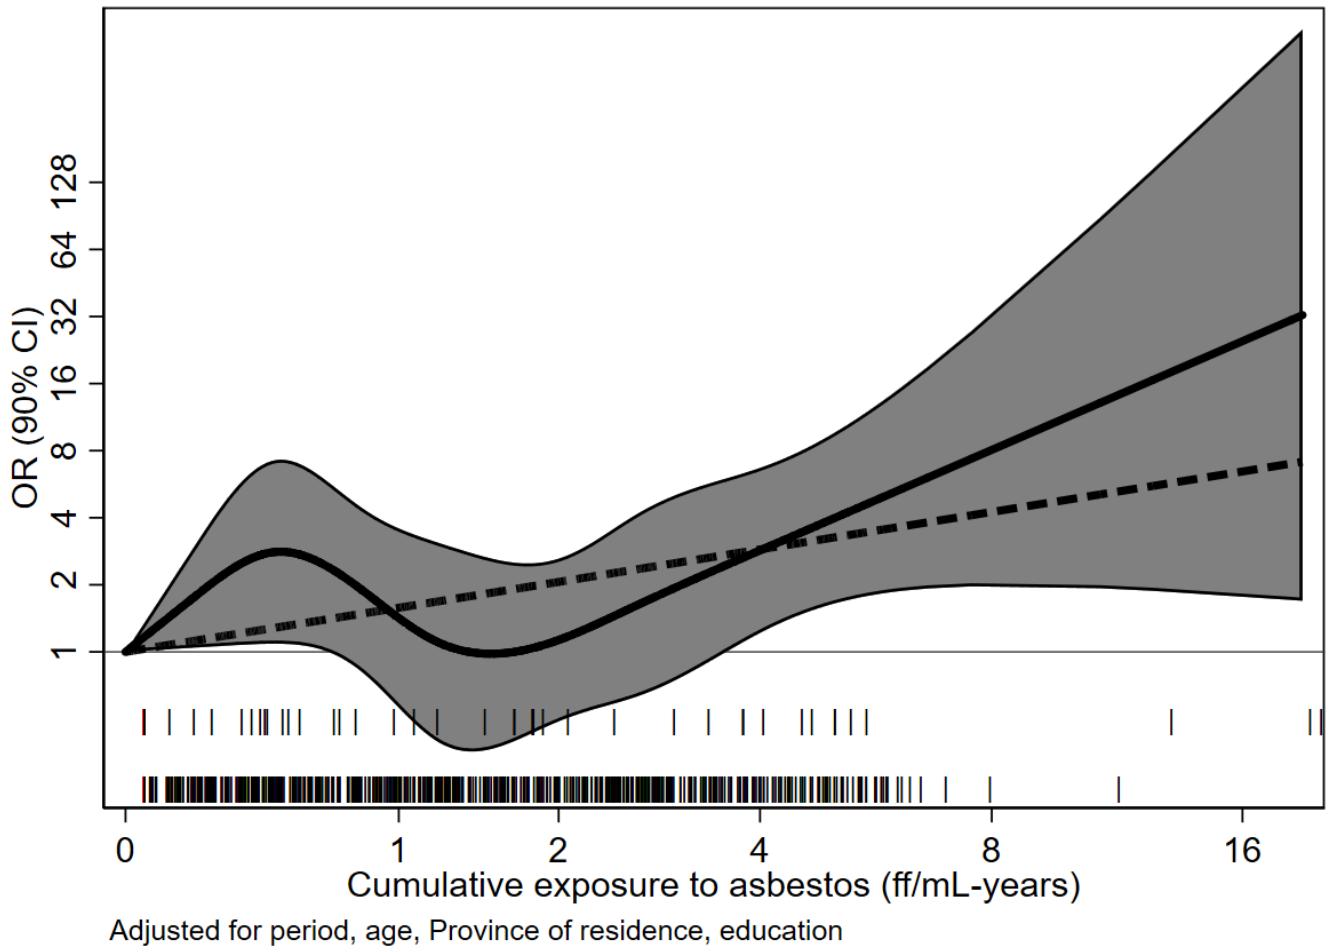

**Supplementary Table 8** Peritoneal mesothelioma odds ratios (OR) and 90% confidence intervals (CI) for occupational asbestos exposure from the job-exposure matrix (SYN-JEM), calculated with conditional logistic regression models (set: age category), adjusted for period (2000-2004 and 2010-2014), province of residence, education, and residual age within age category, Lombardy, Italy, 2000-2014. **In 2000-2004 only cases living in the same 216 municipalities of EAGLE controls were included (spatiotemporal restriction)**

| Occupational asbestos exposure          | Men         |                | OR    | 90% CI    | Women       |                | OR   | 90% CI    |
|-----------------------------------------|-------------|----------------|-------|-----------|-------------|----------------|------|-----------|
|                                         | Cases N (%) | Controls N (%) |       |           | Cases N (%) | Controls N (%) |      |           |
| Total 2000-2014                         | 63 (100)    | 1758 (100)     |       |           | 53 (100)    | 563 (100)      |      |           |
| Total 2000-2004                         | 10 (15.9)   | 1617 (92.0)    |       |           | 6 (11.3)    | 499 (88.6)     |      |           |
| Total 2010-2014                         | 53 (84.1)   | 141 (8.0)      |       |           | 47 (88.7)   | 64 (11.4)      |      |           |
| Never exposed                           | 29 (46.0)   | 1208 (68.7)    | 1.00  | Reference | 44 (83.0)   | 510 (90.6)     | 1.00 | Reference |
| Ever exposed                            | 34 (54.0)   | 550 (31.3)     | 2.05  | 1.16-3.62 | 9 (17.0)    | 53 (9.4)       | 1.79 | 0.60-5.34 |
| Duration*                               |             |                |       |           |             |                |      |           |
| Never exposed                           | 29 (46.0)   | 1208 (69.3)    | 1.00  | Reference | 44 (83.0)   | 510 (90.7)     | 1.00 | Reference |
| <10 years                               | 11 (17.5)   | 211 (12.1)     | 1.68  | 0.78-3.62 | 3 (5.7)     | 8 (1.4)        | 4.44 | 0.51-39.1 |
| 10-19 years                             | 6 (9.5)     | 89 (5.1)       | 4.71  | 1.63-13.6 | 3 (5.7)     | 20 (3.6)       | 1.09 | 0.21-5.66 |
| 20-29 years                             | 2 (3.2)     | 76 (4.4)       | 0.93  | 0.22-4.03 | 3 (5.7)     | 14 (2.5)       | 2.58 | 0.42-15.9 |
| 30+ years                               | 15 (23.8)   | 159 (9.1)      | 2.31  | 1.08-4.90 | 0 (0.0)     | 10 (1.8)       | NC   | NC        |
| P-trend                                 |             |                | 0.06  |           |             |                | 0.55 |           |
| Duration (per 10 years)*                |             |                | 1.23  | 1.03-1.46 |             |                | 1.18 | 0.67-2.06 |
| Cumulative exposure*                    |             |                |       |           |             |                |      |           |
| Never exposed                           | 29 (46.0)   | 1208 (69.3)    | 1.00  | Reference | 44 (83.0)   | 510 (90.7)     | 1.00 | Reference |
| <0.888 ff/mL-years                      | 13 (20.6)   | 231 (13.3)     | 2.13  | 1.02-4.45 | 3 (5.7)     | 19 (3.4)       | 0.75 | 0.14-3.87 |
| <3.158ff/mL-years                       | 11 (17.5)   | 218 (12.5)     | 1.44  | 0.65-3.21 | 3 (5.7)     | 23 (4.1)       | 1.89 | 0.35-10.1 |
| 3.158+ ff/mL-years                      | 10 (15.9)   | 86 (4.9)       | 3.28  | 1.36-7.92 | 3 (5.7)     | 10 (1.8)       | 10.2 | 1.67-62.0 |
| P-trend                                 |             |                | 0.03  |           |             |                | 0.11 |           |
| Cumulative exposure* (ff/mL-years)      |             |                | 1.21  | 1.05-1.40 |             |                | 1.54 | 1.03-2.31 |
| Cumulative exposure* (log(ff/mL-years)) |             |                | 1.82  | 1.18-2.80 |             |                | 2.97 | 1.06-8.32 |
| TSFE                                    |             |                |       |           |             |                |      |           |
| Never exposed                           | 29 (46.0)   | 1208 (69.1)    | 1.00  | Reference | 44 (83.0)   | 510 (90.7)     | 1.00 | Reference |
| <40 years                               | 4 (6.3)     | 167 (9.6)      | 0.86  | 0.28-2.67 | 2 (3.8)     | 27 (4.8)       | 1.00 | 0.16-6.31 |
| 40-49 years                             | 11 (17.5)   | 199 (11.4)     | 1.43  | 0.61-3.33 | 5 (9.4)     | 18 (3.2)       | 2.75 | 0.52-14.4 |
| 50-59 years                             | 10 (15.9)   | 135 (7.7)      | 2.48  | 1.07-5.71 | 2 (3.8)     | 5 (0.9)        | 2.19 | 0.27-17.6 |
| 60+ years                               | 9 (14.3)    | 39 (2.2)       | 7.44  | 2.37-23.3 | 0 (0.0)     | 2 (0.4)        | NC   | NC        |
| P-trend                                 |             |                | 0.004 |           |             |                | 0.31 |           |

Period 2000-2004 includes cases first diagnosed in 2000-2004 and EAGLE controls enrolled in 2002-2004; both series living in 216 municipalities in five provinces and aged 35-79 years. Period 2010-2014 includes cases first diagnosed in 2010-2014 and MISEM controls enrolled in 2014; both series living in any province and aged 20-89 years.

Abbreviations: TSFE, time since first exposure.

\*Missing data for 16 EAGLE controls (15 men and 1 woman) with incomplete job histories.

**Supplementary Figure 3** Association between peritoneal mesothelioma risk and SYN-JEM-based cumulative asbestos exposure (ff/mL-years) in men (same cases and controls as in Supplementary Table 8) using restricted cubic splines (knots at 10th, 25th, 50th, 75th and 90th percentiles of cumulative exposure among exposed, log-transformed), Lombardy, Italy, 2000-2014  
 Notes: CI, confidence interval; OR, odds ratio; the dashed line shows the log-linear relationship OR = 1.82 per ln(ff/mL-years) (see Supplementary Table 8); vertical bars close to the horizontal axis indicate cases (upper bars) and controls (lower bars).

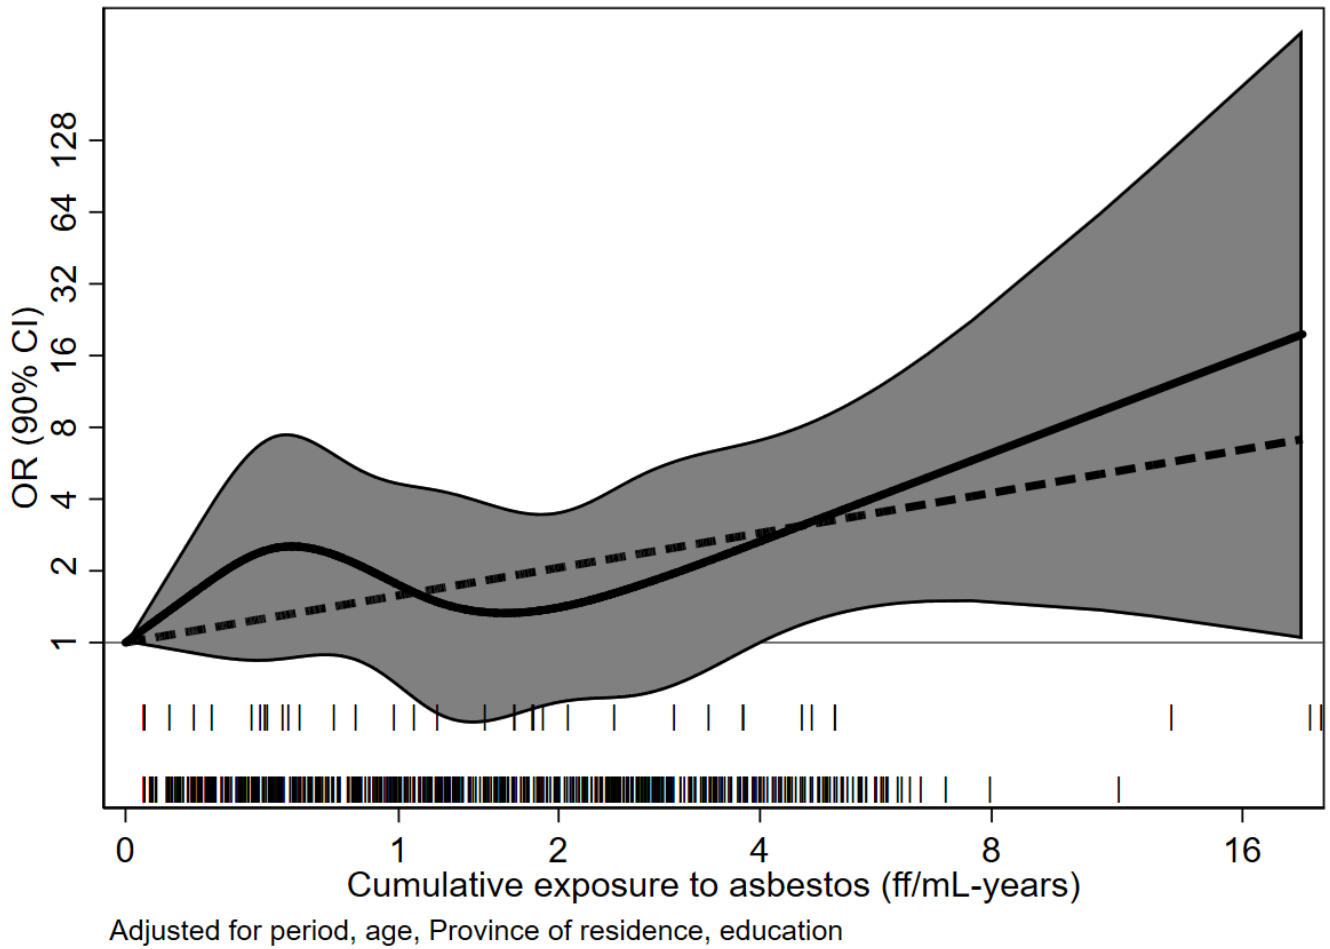

**Supplementary Table 9** Comparison of occupational asbestos exposure\* from the job-exposure matrix (SYN-JEM) with expert-based assessment based on the national mesothelioma registry (ReNaM) questionnaire, Lombardy, Italy, period 2008-2015

| Occupational asbestos exposure | Cases      |       | Controls    |       | All        |       |
|--------------------------------|------------|-------|-------------|-------|------------|-------|
|                                | ReNaM      |       | ReNaM       |       | ReNaM      |       |
| Men                            | Ever       | Never | Ever        | Never | Ever       | Never |
| SYN-JEM                        |            |       |             |       |            |       |
| Ever                           | 47         | 4     | 32          | 15    | 79         | 19    |
| Never                          | 15         | 18    | 16          | 75    | 31         | 93    |
| Sensitivity                    | 0.76       |       | 0.67        |       | 0.72       |       |
| 90% CI†                        | 0.66; 0.84 |       | 0.55; 0.77  |       | 0.64; 0.78 |       |
| Specificity                    | 0.82       |       | 0.83        |       | 0.83       |       |
| 90% CI†                        | 0.65; 0.92 |       | 0.76; 0.89  |       | 0.76; 0.88 |       |
| Cohen's kappa                  | 0.50       |       | 0.50        |       | 0.55       |       |
| 90% CI                         | 0.40; 0.59 |       | 0.41; 0.60  |       | 0.47; 0.62 |       |
| Women                          | Ever       | Never | Ever        | Never | Ever       | Never |
| SYN-JEM                        |            |       |             |       |            |       |
| Ever                           | 6          | 4     | 0           | 3     | 6          | 7     |
| Never                          | 19         | 41    | 5           | 56    | 24         | 97    |
| Sensitivity                    | 0.24       |       | 0.00        |       | 0.20       |       |
| 90% CI†                        | 0.13; 0.40 |       | 0.00; 0.40  |       | 0.10; 0.34 |       |
| Specificity                    | 0.91       |       | 0.95        |       | 0.93       |       |
| 90% CI†                        | 0.81; 0.96 |       | 0.88; 0.98  |       | 0.88; 0.96 |       |
| Cohen's kappa                  | 0.17       |       | -0.06       |       | 0.17       |       |
| 90% CI                         | 0.02; 0.33 |       | -0.17; 0.05 |       | 0.08; 0.25 |       |
| All                            | Ever       | Never | Ever        | Never | Ever       | Never |
| SYN-JEM                        |            |       |             |       |            |       |
| Ever                           | 53         | 8     | 32          | 18    | 85         | 26    |
| Never                          | 34         | 59    | 21          | 131   | 55         | 190   |
| Sensitivity                    | 0.61       |       | 0.60        |       | 0.61       |       |
| 90% CI†                        | 0.52; 0.69 |       | 0.49; 0.71  |       | 0.54; 0.67 |       |
| Specificity                    | 0.88       |       | 0.88        |       | 0.88       |       |
| 90% CI†                        | 0.80; 0.93 |       | 0.83; 0.92  |       | 0.84; 0.91 |       |
| Cohen's kappa                  | 0.47       |       | 0.49        |       | 0.51       |       |
| 90% CI                         | 0.39; 0.55 |       | 0.41; 0.57  |       | 0.43; 0.58 |       |

Period 2008-2015 includes cases first diagnosed in 2008-2015 and MISEM controls enrolled in 2014; both series aged 20-89 years

Abbreviations: CI, confidence interval.

\*Cases with extra-occupational exposure not included in analysis.

†Calculated with the Agresti-Coull formula.
